# Supplementary material
Source: bioRxiv or medRxiv preprint supplement (https://www.biorxiv.org/highwire/filestream/537/field_highwire_adjunct_files/0/001875-1.zip)
Supplement: Supplementary file [file 001875-1.zip]

## **Appendix 5. Alignments for those genes without D or T arms**

These images show the sequence alignments used to examine the hypothesis that some Dorylaimia genes might code for tRNAs that lack both a D arm and a T arm. The images were produced by the MacClade v. 4.08 program.

The sequences are arranged into their taxonomic groups, which are labeled on blank sequence rows.

Two alignments are shown for the Mermithida, above and below the STRUCTURE row. The first alignment shows the genes as annotated in GenBank, and the second shows the revised annotation without a D arm.

The tRNA structure is shown as a separate line, with letters indicating the paired nucleotides in each stem (H = acceptor stem, D = D-arm stem, W = anticodon stem, V = T-arm stem) and also the anticodon (S). The nucleotides have unique colors.

Figure 1. Alignment for the tRNA-cys genes of 29 species of Nematoda

Figure 2. Alignment for the tRNA-ala genes of 9 species of Dorylaimia

Figure 3. Alignment for the tRNA-asn genes of 9 species of Dorylaimia

Figure 4. Alignment for the tRNA-ile genes of 9 species of Dorylaimia

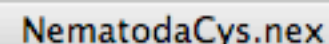[illegible]

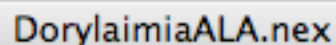[illegible]

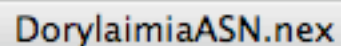

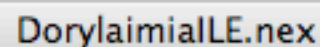[illegible]
